# Supplementary material for: Structural basis of death domain signaling in the p75 neurotrophin receptor
Source: eLife journal article supplement (doi:10.7554/elife.11692), 2015-12-08
Supplement: supp [file elife-11692-supp-v1.zip]

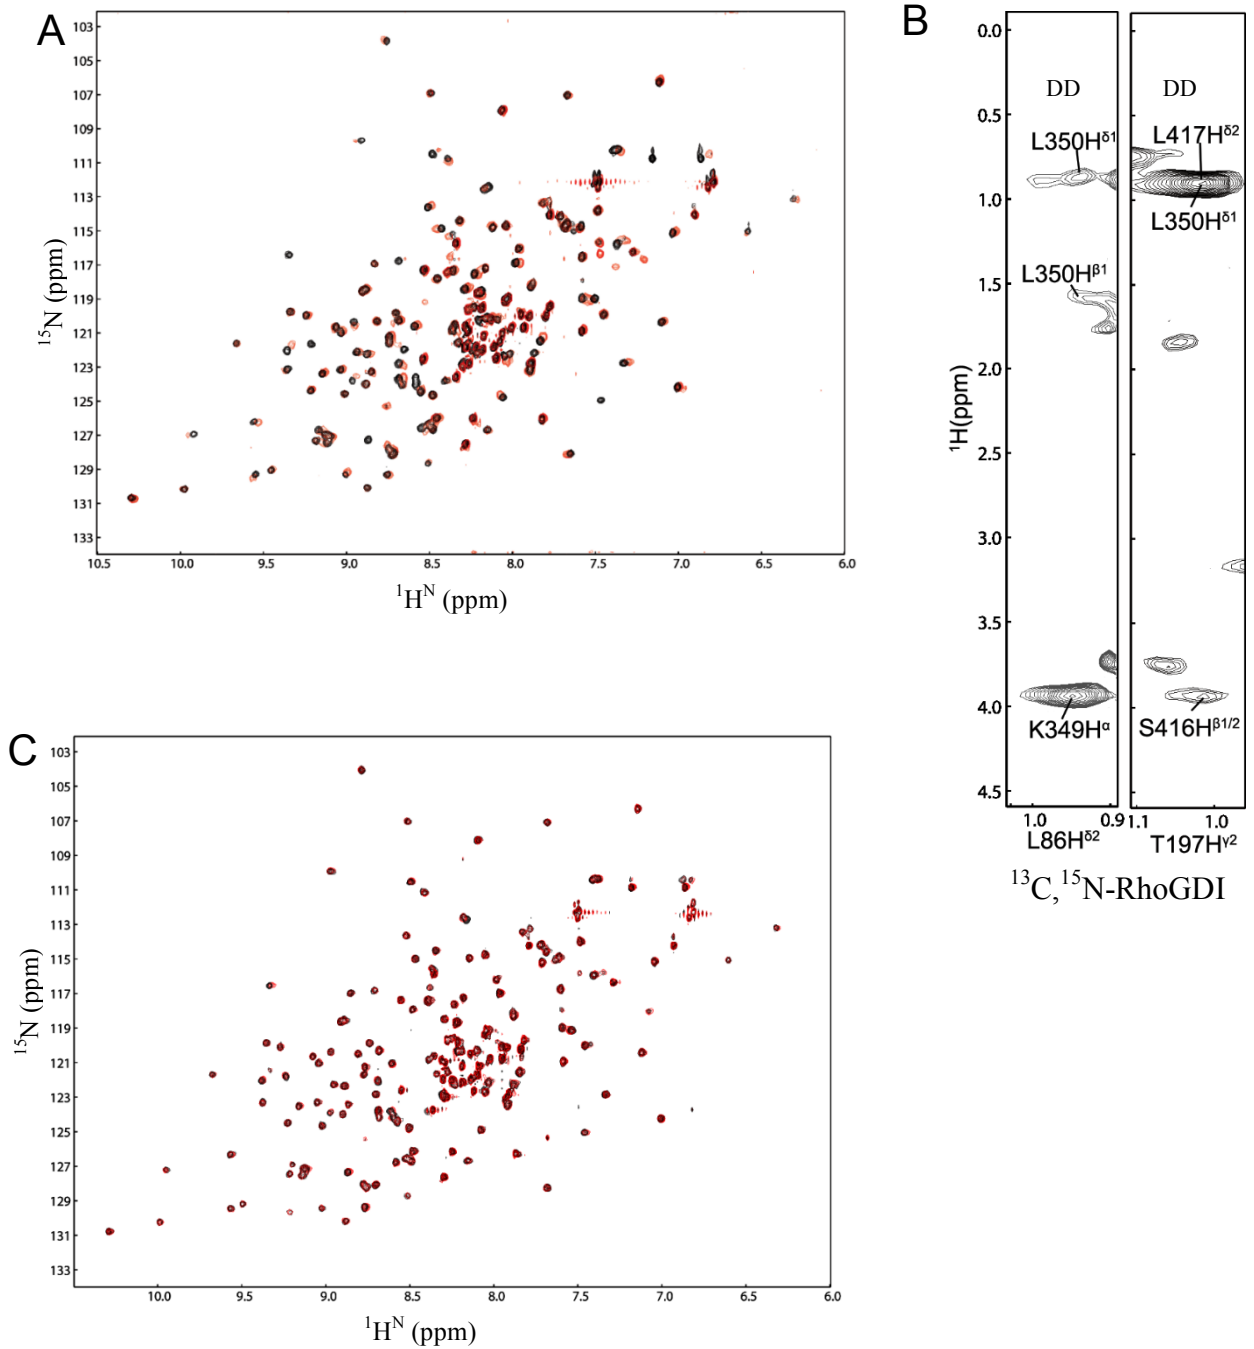

**Figure 1—figure supplement 1. NMR spectra of DD:RhoGDI complex in 20mM HEPES at 28°C and pH 6.9.** A)  $[^1\text{H}-^{15}\text{N}]$  HSQC spectra of  $^{15}\text{N}$ -RhoGDI in the absence (black) and presence (red) of p75<sup>NTR</sup> DD. The concentration of RhoGDI and p75<sup>NTR</sup> DD was 0.5mM and 2mM, respectively. B) Representative slices from the  $^{13}\text{C}, ^{15}\text{N}$ -filtered 3D NOESY spectrum. C)  $[^1\text{H}-^{15}\text{N}]$  HSQC spectra of  $^{15}\text{N}$ -RhoGDI in complex with p75<sup>NTR</sup> DD in the absence (black) and presence (red) of 250mM NaCl.
