# Supplementary material for: Structural basis of death domain signaling in the p75 neurotrophin receptor
Source: eLife journal article supplement (doi:10.7554/elife.11692), 2015-12-08
Supplement: supp [file elife-11692-supp-v1.zip]

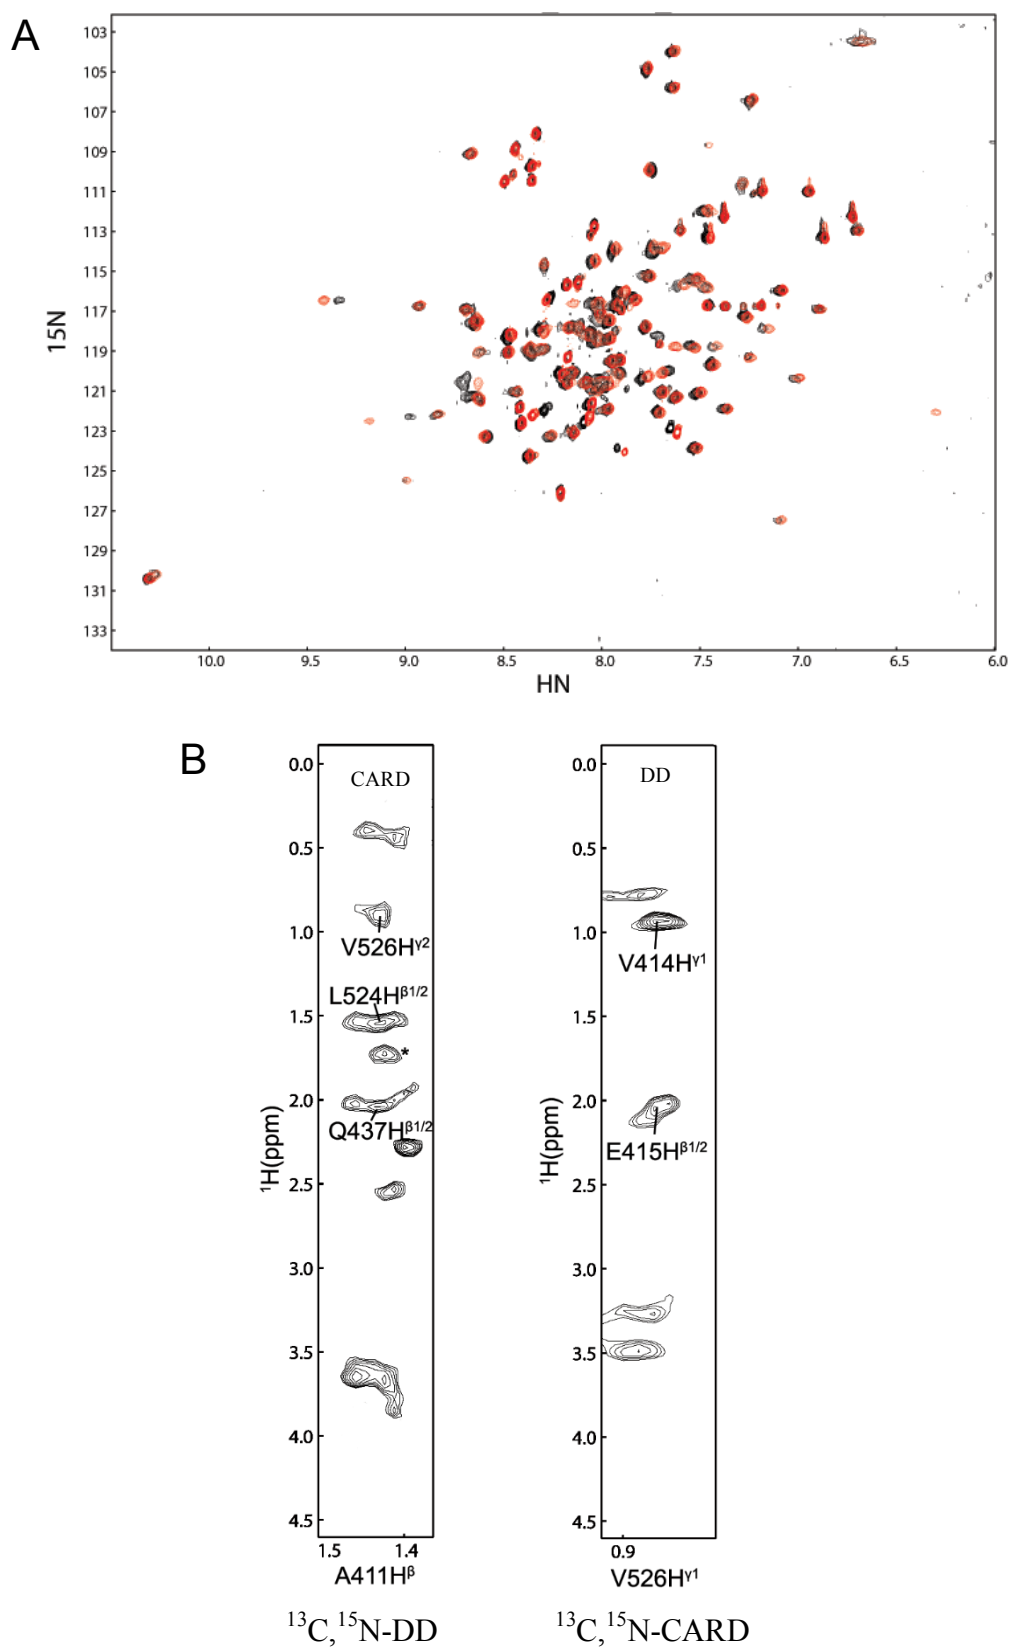

**Figure 3—figure supplement 2. NMR Spectra of DD: CARD complex.** A)  $[\text{}^1\text{H}\text{-}^{15}\text{N}]$  HSQC spectra of p75<sup>NTR</sup> DD in water in the absence (black) and presence (red) of RIP2 CARD. B) Representative slices from the  $^{13}\text{C}, ^{15}\text{N}$ -filtered 3D NOESY spectra. Asterisk denotes ambiguous NOE peak.
