# Supplementary material for: Structural basis of death domain signaling in the p75 neurotrophin receptor
Source: eLife journal article supplement (doi:10.7554/elife.11692), 2015-12-08
Supplement: supp [file elife-11692-supp-v1.zip]

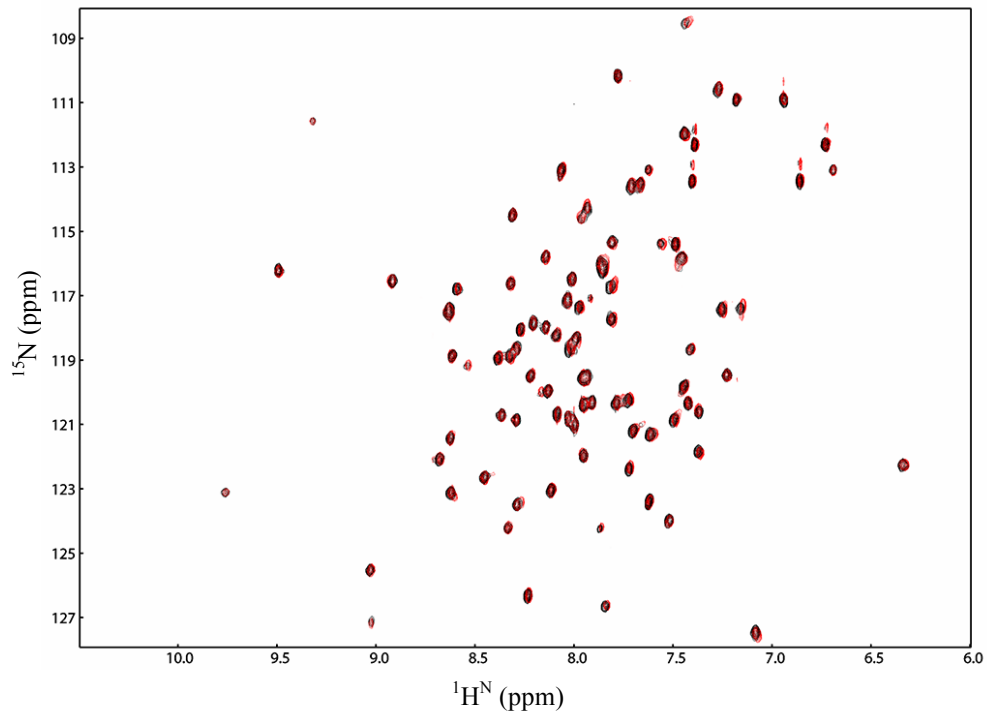

**Figure 1—figure supplement 2. The N-terminal domain of RhoGDI does not bind to  $\text{p75}^{\text{NTR}}$  DD.** [ $^1\text{H}$ - $^{15}\text{N}$ ] HSQC spectra of  $\text{p75}^{\text{NTR}}$  DD in the presence of RhoGDI (black) and RhoGDI without N-terminal domain (RhoGDI  $\Delta\text{N}$ , red) at 28 °C and pH 6.9. Molar ratio of DD to RhoGDI or to RhoGDI  $\Delta\text{N}$  was 1:4.
