# Supplementary material for: Structural basis of death domain signaling in the p75 neurotrophin receptor
Source: eLife journal article supplement (doi:10.7554/elife.11692), 2015-12-08
Supplement: supp [file elife-11692-supp-v1.zip]

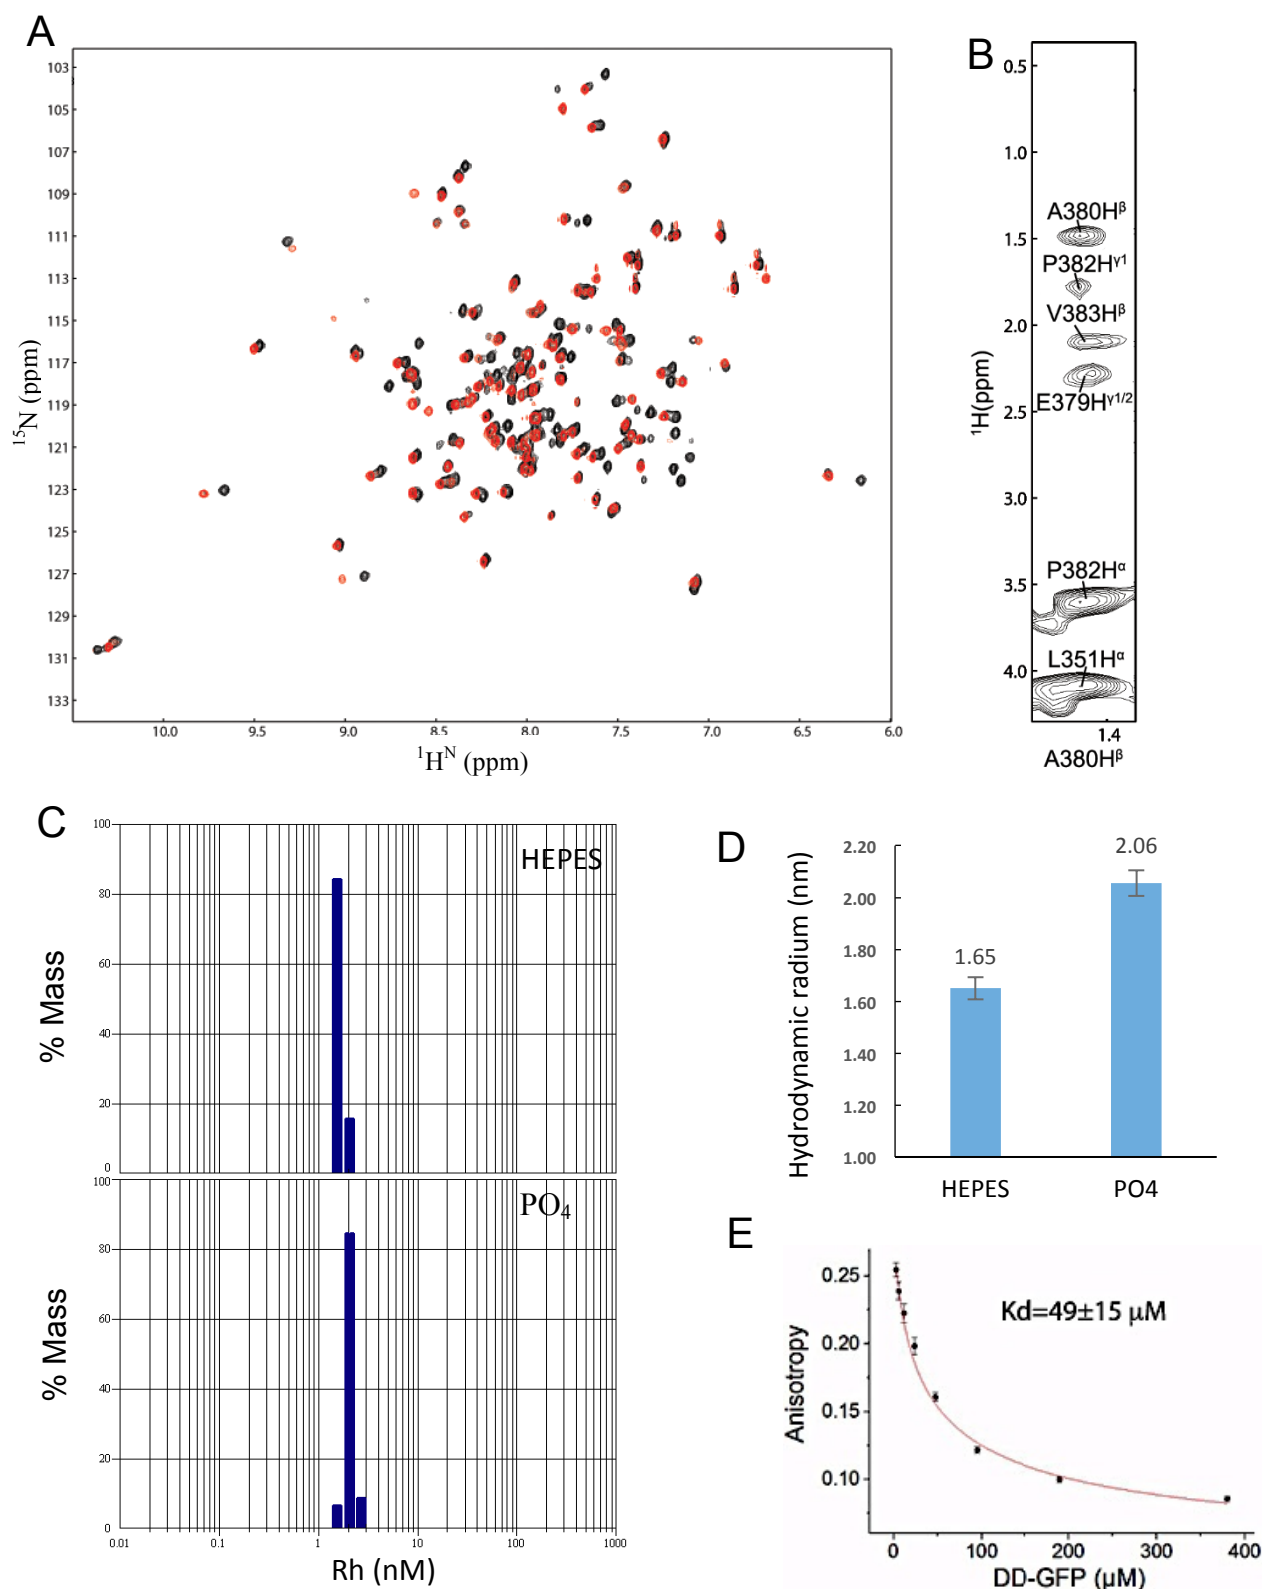

**Figure 5—figure supplement 1. Homodimerization of p75<sup>NTR</sup> DD.** A) [ $^1\text{H}$ - $^{15}\text{N}$ ] HSQC spectra of p75<sup>NTR</sup> DD in HEPES buffer (black) and phosphate buffer (red) at pH6.9 and 28 °C. B) Representative slices from the  $^{13}\text{C}$ ,  $^{15}\text{N}$ -filtered 3D NOESY spectrum. C) Apparent hydrodynamic radius (Rh) distribution of DD from DLS measurement in HEPES (top) and phosphate buffer (bottom), respectively. The protein concentrations used are ~0.2 mM. D) Average Rh of DD in HEPES and phosphate buffers. The theoretical Rh of DD monomer (~10 kDa) and homodimer (~20 kDa) are ~1.6nm and ~2.2nm, respectively. E) Determination of monomer-dimer Kd using anisotropy change resulting from FRET. p75<sup>NTR</sup> DD tagged with EGFP(A206K) in its C-terminus was used in these experiments. N=3.
