# Supplementary material for: Structural basis of death domain signaling in the p75 neurotrophin receptor
Source: eLife journal article supplement (doi:10.7554/elife.11692), 2015-12-08
Supplement: supp [file elife-11692-supp-v1.zip]

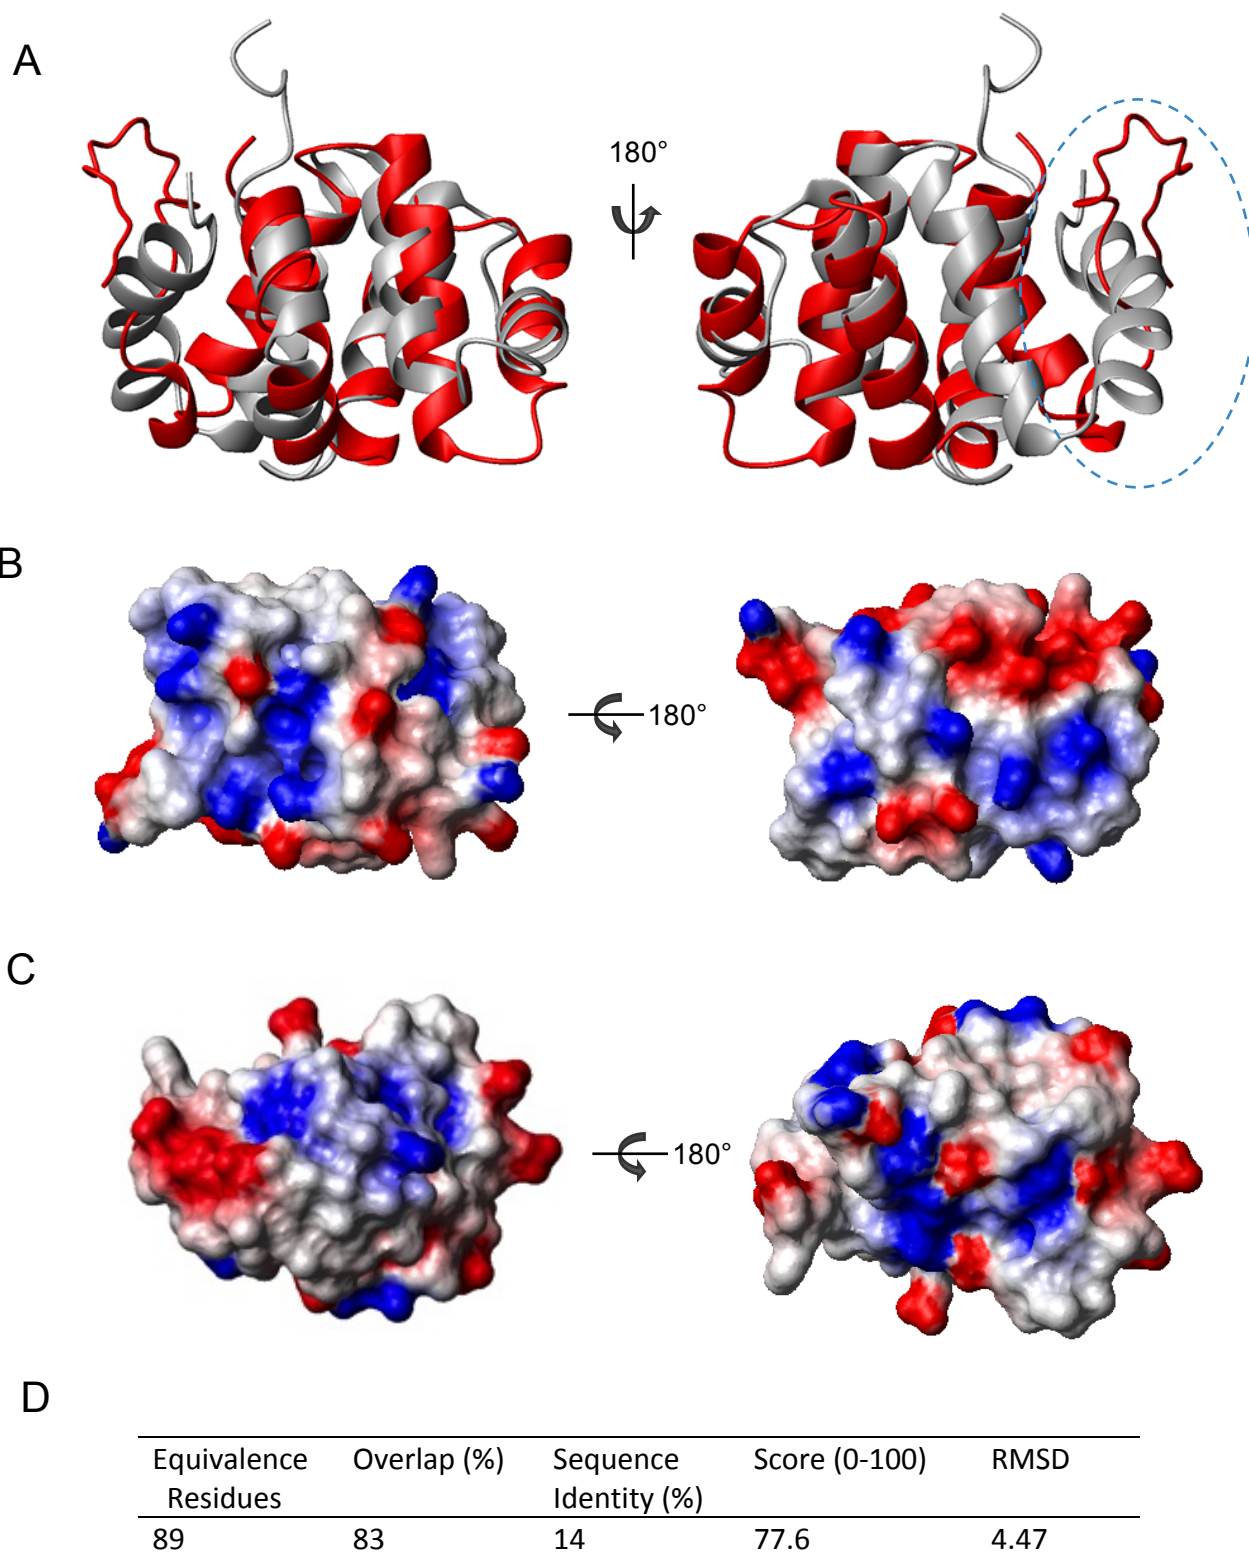

**Figure 3—figure supplement 1. Structure comparison of CARD domains using a sequential structure alignment program (<http://v3-4.cathdb.info/>). A) Overlap of RIP2 CARD (red) and NOD1 CARD (grey, PDB ID: 2B1W). B) Surface charge of RIP2 CARD without C-terminal tail. Positive charge surface is colored in blue, negative in red and non-charged in white. C) Surface charge of NOD1 CARD. D) Statistics of pairwise alignment of CARDS from RIP2 and NOD1.**
