# Supplementary material for: Structural basis of death domain signaling in the p75 neurotrophin receptor
Source: eLife journal article supplement (doi:10.7554/elife.11692), 2015-12-08
Supplement: supp [file elife-11692-supp-v1.zip]

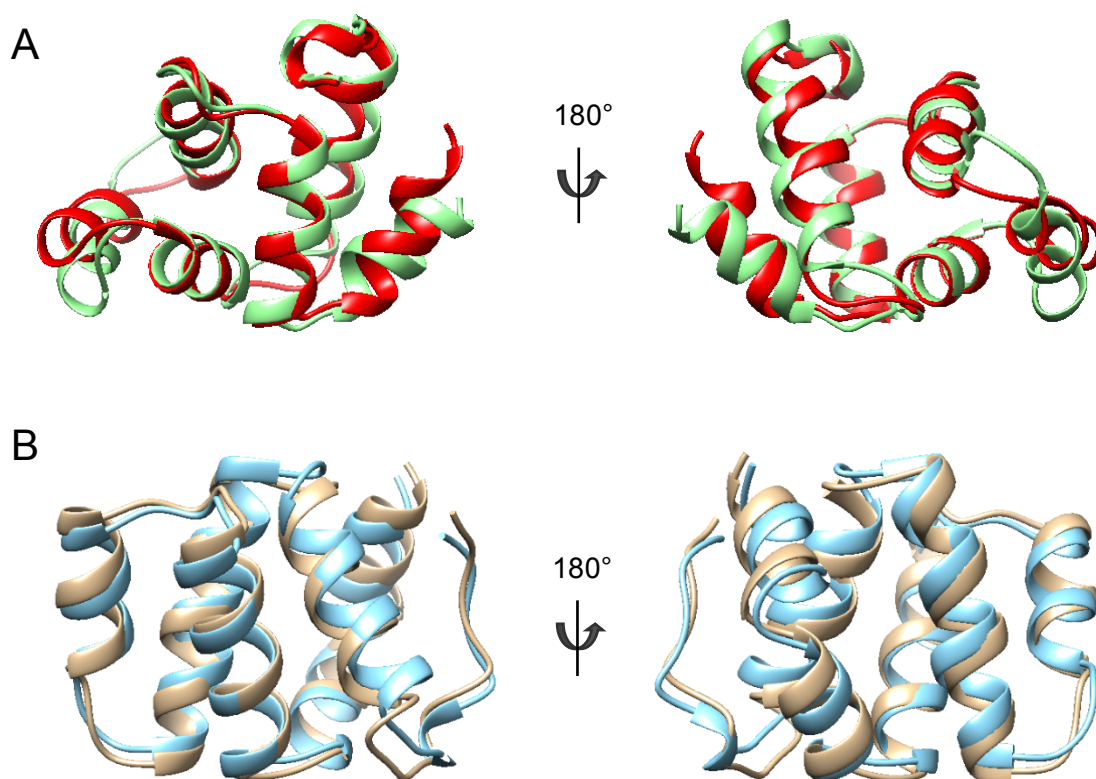

**Figure 3—figure supplement 3. Structural comparisons of p75<sup>NTR</sup> DD and RIP2 CARD domains.** A) Structural comparison between p75<sup>NTR</sup> DD from the DD:RhoGDI (red) and DD:CARD (green) complexes. B) Structural comparison between monomeric RIP2 CARD (cyan) and RIP2 CARD from the DD:CARD complex (light brown).
