# Supplementary material for: Structural basis of death domain signaling in the p75 neurotrophin receptor
Source: eLife journal article supplement (doi:10.7554/elife.11692), 2015-12-08
Supplement: supp [file elife-11692-supp-v1.zip]

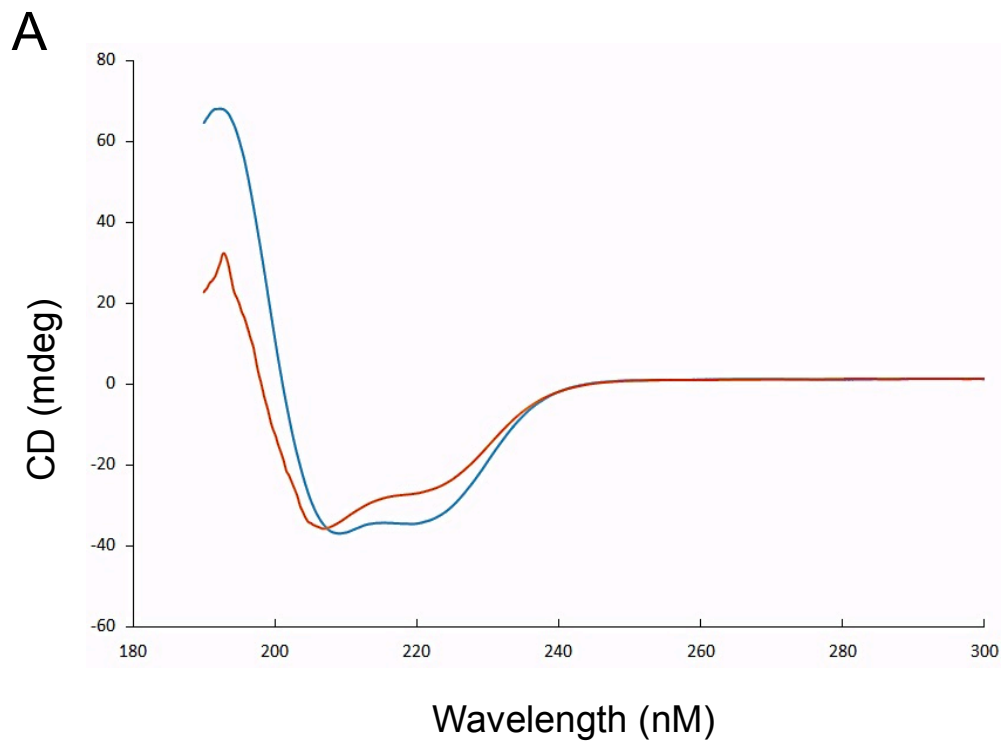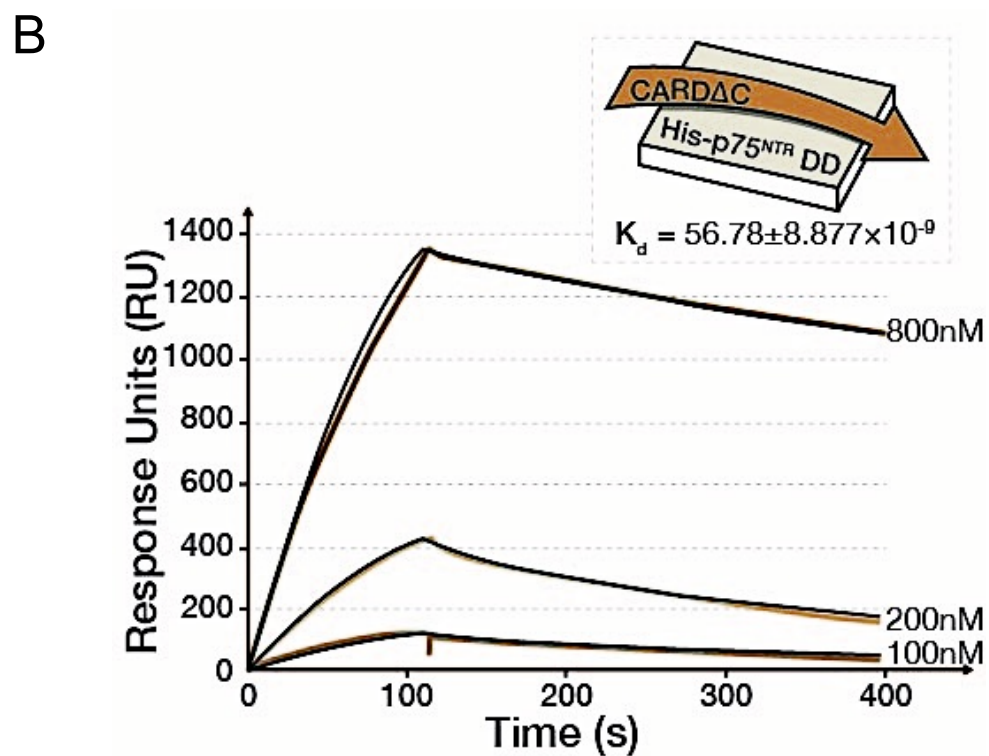

**Figure 3—figure supplement 4. The C-terminal tail of RIP2 CARD contributes to its interaction with the p75<sup>NTR</sup> DD.** A) CD spectra of CARD (orange) and CARD  $\Delta$ C mutant lacking the C-terminal tail (blue). B) Sensorgram of binding kinetics of CARD  $\Delta$ C binding to p75<sup>NTR</sup> DD at pH7.0. One binding site model was used for fitting of SPR data.
