# Supplementary material for: Structural basis of death domain signaling in the p75 neurotrophin receptor
Source: eLife journal article supplement (doi:10.7554/elife.11692), 2015-12-08
Supplement: supp [file elife-11692-supp-v1.zip]

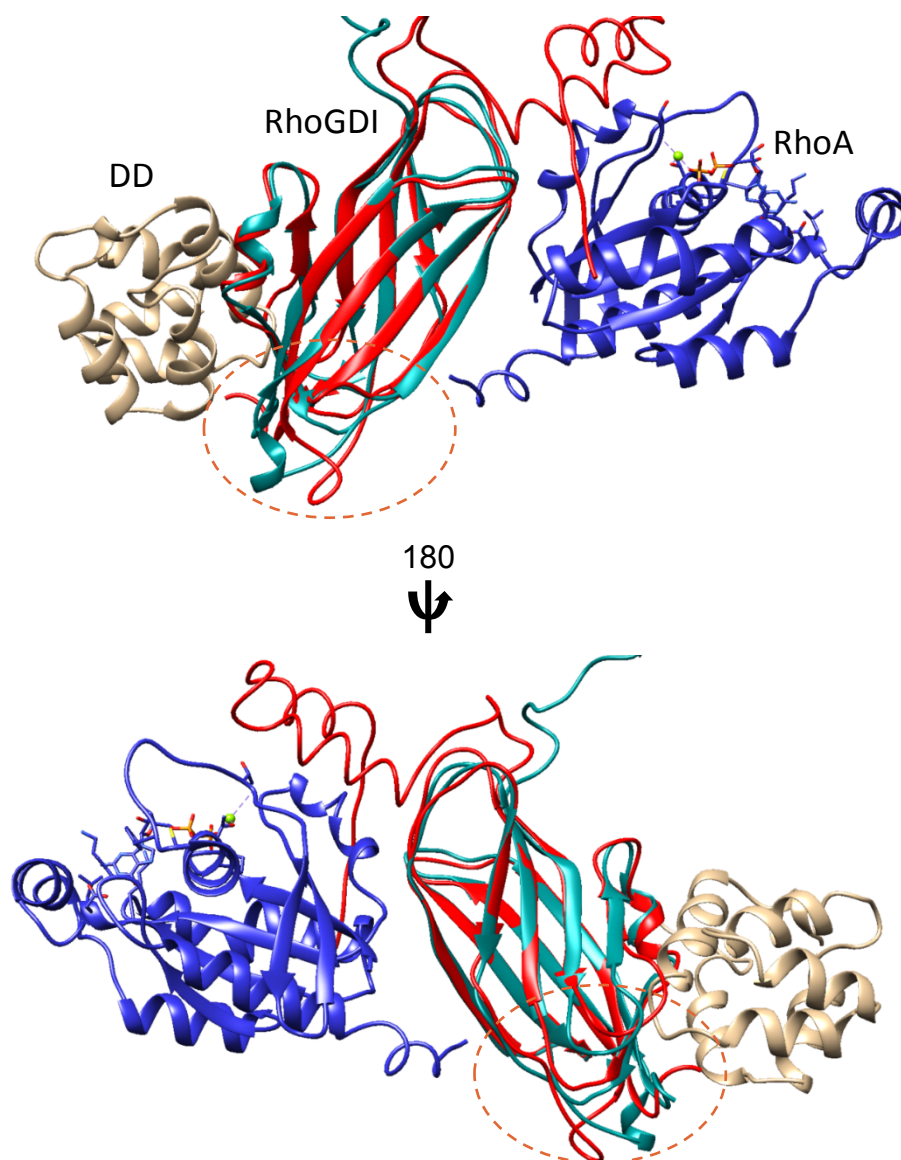

**Figure 2—figure supplement 1. Local structural differences in RhoGDI after interaction with either p75<sup>NTR</sup> DD or RhoA:GDP.** Ribbon diagram of RhoGDI from the complex with p75<sup>NTR</sup> DD (light brown) is shown in cyan, and from the complex with RhoA (blue) in red (from Longenecker et al., 1999). Main structural differences in RhoGDI are indicated by the dotted line circle.
